# Supplementary material
Source: Springer Nature journal article supplement (https://www.springermedizin.de/resource/supplementary/12936_2011_2001_MOESM9_ESM.pdf/9543102)
Supplement: MOESM9 [file 9543102]

Table 1. Comparison of baseline characteristics of (A) the 19 autopsy patients presented in the first part of the study and (B) the admitted patients presenting with or without features of malaria retinopathy in the second part of the study.

**A. Autopsy Patients (1999 - 2001)**

| Characteristic      | Cerebral Malaria (+/- SMA) (N = 10) | Non-CM (including SMA) (N = 9) | P*   |
|---------------------|-------------------------------------|--------------------------------|------|
| <i>Median (IQR)</i> |                                     |                                |      |
| Age [months]        | 24 (18 - 70)                        | 25.5 (17 - 39)                 | 0.64 |
| Time [weeks]†       | 13.6 (9.4 - 16.4)                   | 10 (9 - 14.3)                  | 0.49 |
| Hematocrit [%]      | 18 (14 - 31)                        | 29.5 (22 - 40)                 | 0.15 |
| Parasitemia [p/ul]  | 275,200 (11,399 - 572,880)          | 98,518 (4,716 - 286,850)       | 0.25 |

**B. Admitted patients (2009)**

| Characteristic      | Retinopathy Positive (N = 69) | Retinopathy Negative (N = 34) | P*     |
|---------------------|-------------------------------|-------------------------------|--------|
| <i>Median (IQR)</i> |                               |                               |        |
| Age [months]        | 38 (25 - 56)                  | 51 (31 - 67)                  | 0.19   |
| Time [weeks]†       | 7.4 (4.3, 12.9)               | 10.4 (4.1, 17.4)              | 0.44   |
| Hematocrit [%]      | 22 (18, 27)                   | 30 (25, 34)                   | 0.0003 |
| Parasitemia [p/ul]  | 101,176 (31,590 – 366,070)    | 70,230 (42,871 – 211,680)     | 0.71   |

IQR = interquartile range; p/ul = parasites per microliter

\* P-values for numerical variables were estimated using t-tests, when reporting means and Wilcoxon tests, when reporting medians

† Time from January 1 until date of patient's sample collection
